# Supplementary material
Source: PubMed Central journal article supplement (PMC3800181)
Supplement: NIHMS444014-supplement-1_si_001.pdf [file NIHMS444014-supplement-1_si_001.pdf]

# **Supporting Information**

**pH Responsive Dual Cargo Delivery from Mesoporous Silica Nanoparticles with a Metal-latched Nanogate**

Derrick Tarn, Min Xue, and Jeffrey I. Zink

Department of Chemistry and Biochemistry, California NanoSystems Institute,

University of California, Los Angeles, California 90095, United States

## Table of Contents

|                                                                                                                            |   |
|----------------------------------------------------------------------------------------------------------------------------|---|
| <b>Scheme 1.</b> Synthesis and attachment of nanogate -----                                                                | 3 |
| <b>Figure S1.</b> TEM image of MCM-41 nanoparticles -----                                                                  | 4 |
| <b>Figure S2.</b> XRD powder diffraction of MSN -----                                                                      | 5 |
| <b>Figure S3.</b> Infrared spectrum of template extracted MSN -----                                                        | 5 |
| <b>Figure S4a.</b> SS <sup>13</sup> C NMR spectrum of iminodiacetic acid modified MSN -----                                | 6 |
| <b>Figure S4b.</b> SS <sup>29</sup> Si NMR spectrum of iminodiacetic acid modified MSN -----                               | 6 |
| <b>Figure S5.</b> Time-resolved fluorescence spectrum of competitively binding released nickel(II) latched nanogates ----- | 7 |
| <b>Figure S6.</b> UV-Vis spectra of solution Co/EDTA complexes after simulated loading conditions -----                    | 8 |
| <b>Figure S7.</b> Experimental setup for time-resolved fluorescence spectroscopy -----                                     | 8 |
| <b>Figure S8.</b> UV-Vis spectra of CoCl <sub>2</sub> and CoCl <sub>2</sub> after being coordinated with IDA -----         | 9 |

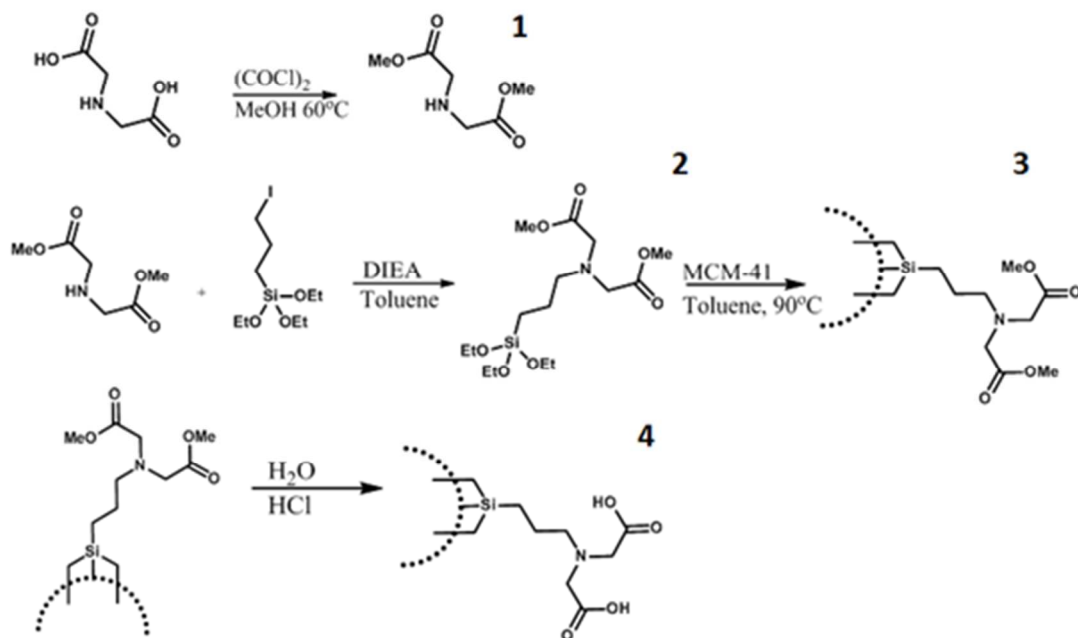

**Scheme S1.** Synthesis and attachment of nanogate machine.

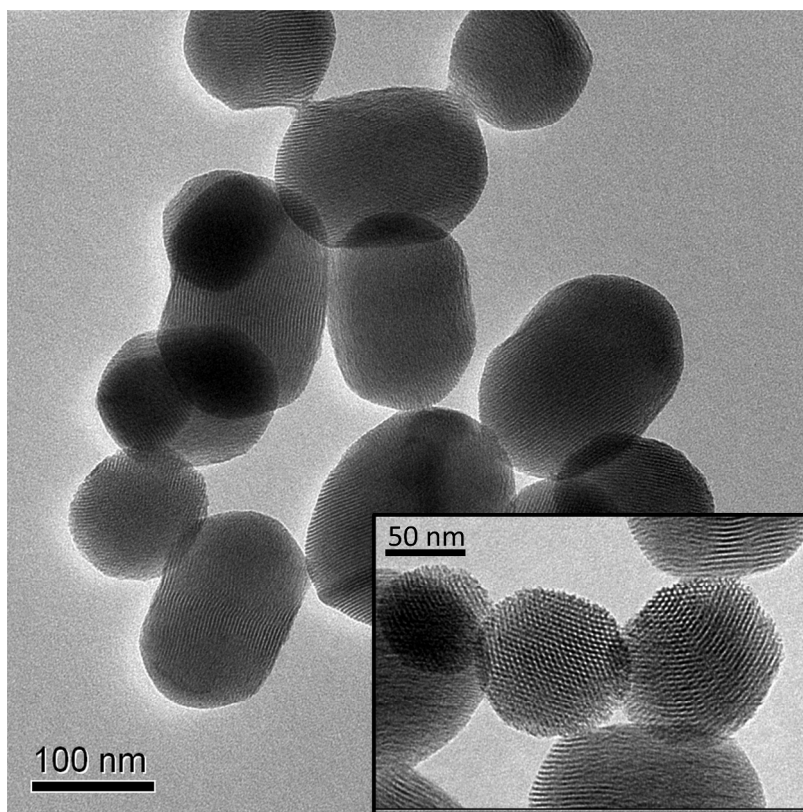

**Figure S1.** TEM image of a typical batch of synthesized and acid extracted MCM-41 nanoparticles.

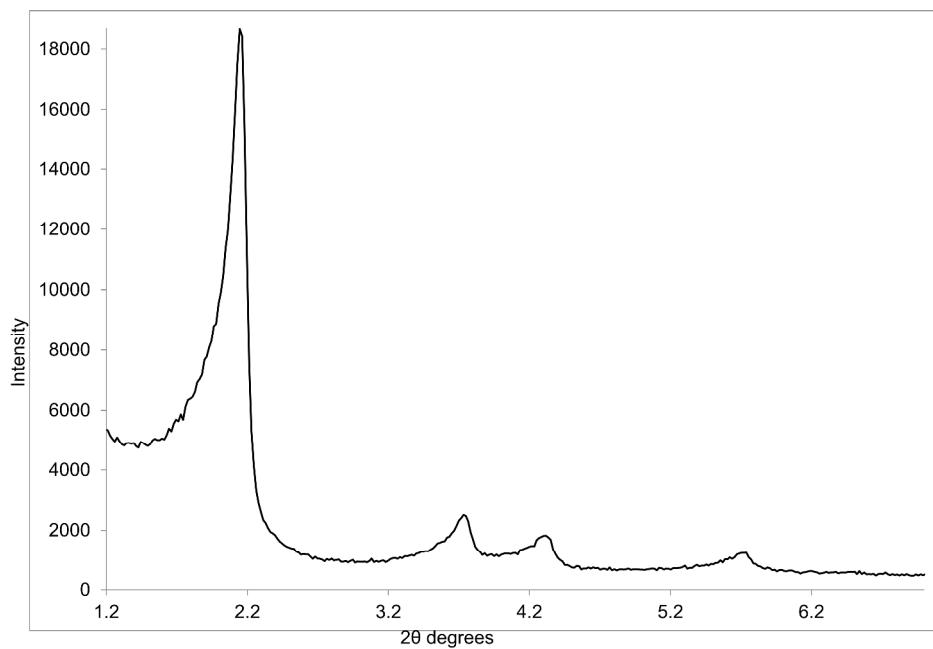

**Figure S2.** Powder XRD diffraction of synthesized MCM-41 nanoparticles.

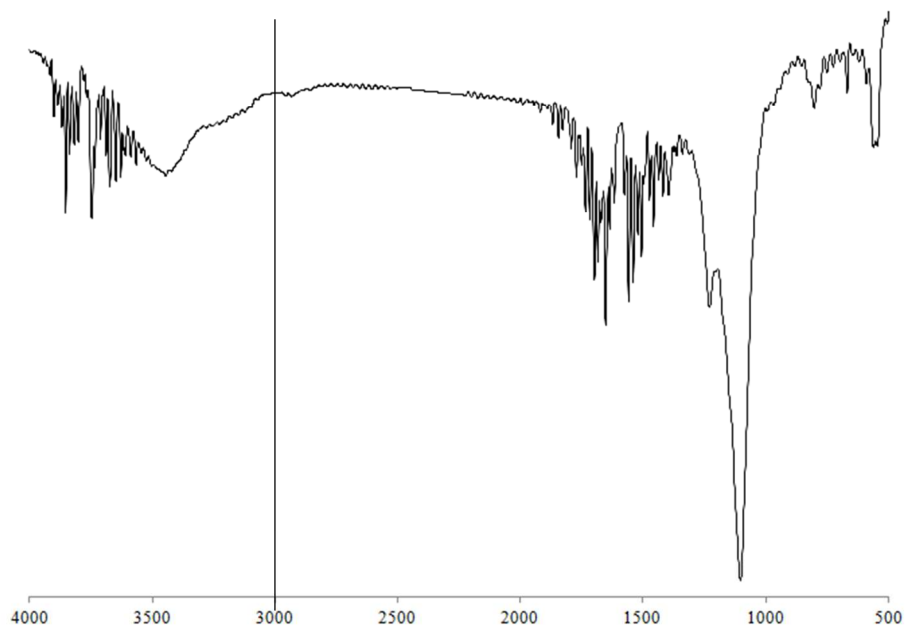

**Figure S3.** IR of surfactant extracted synthesized MSN.

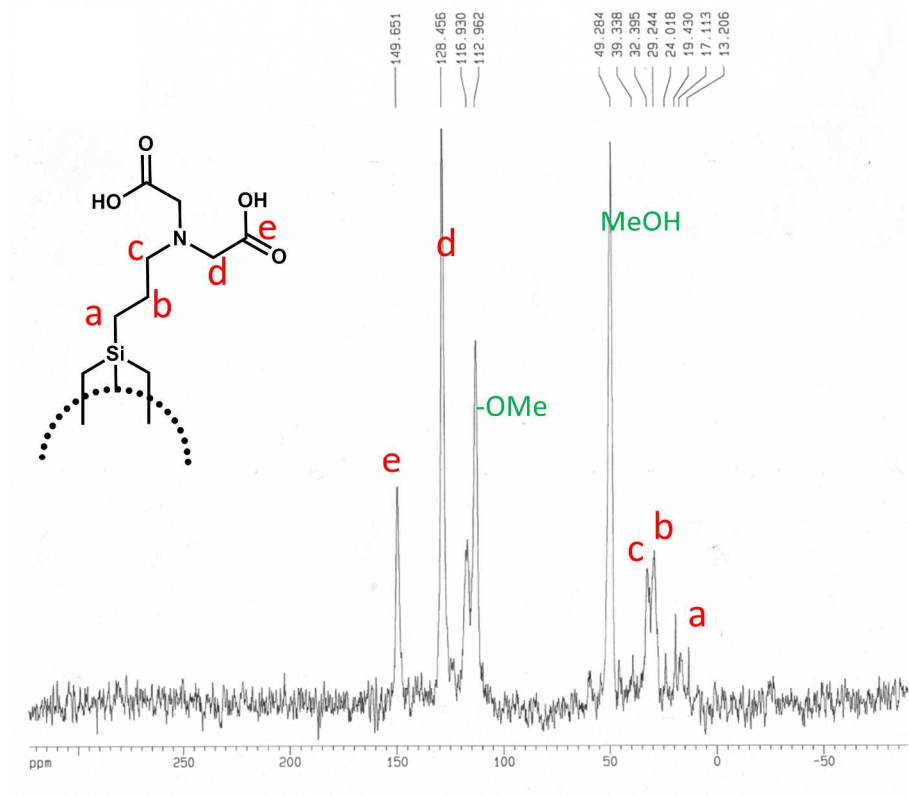

**Figure S4a.** SS  $^{13}\text{C}$  NMR spectrum of iminodiacetic acid modified MSN. Peaks corresponding to IDA are observed in the region  $>50$  ppm. Bare nanoparticles with  $-\text{OMe}$  terminated silanes do not show peaks in this region.

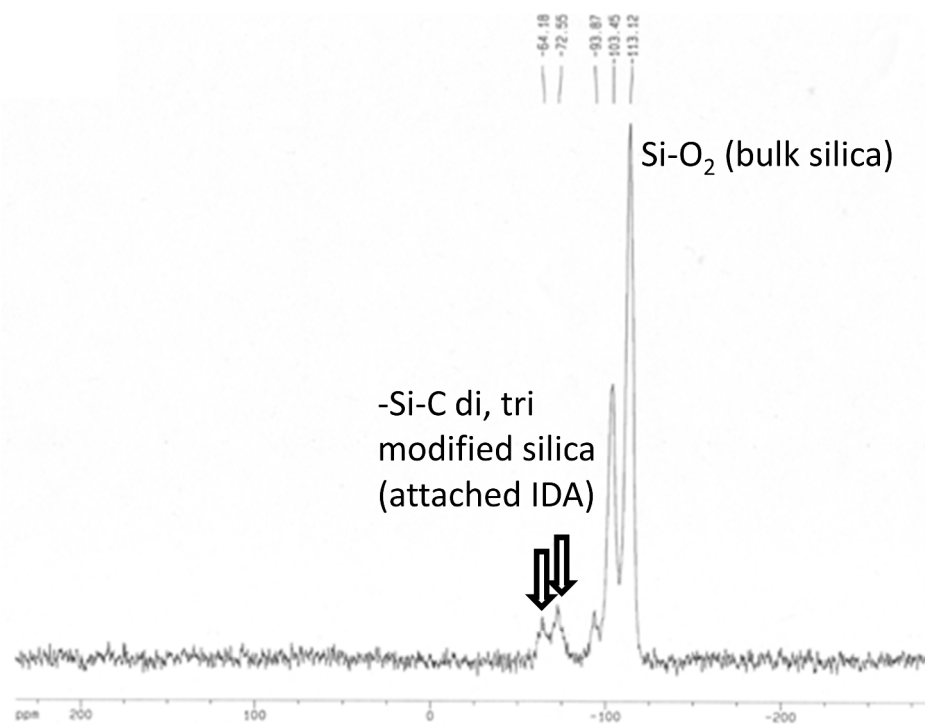

**Figure S4b.** SS  $^{29}\text{Si}$  NMR spectrum of iminodiacetic acid modified MSN.

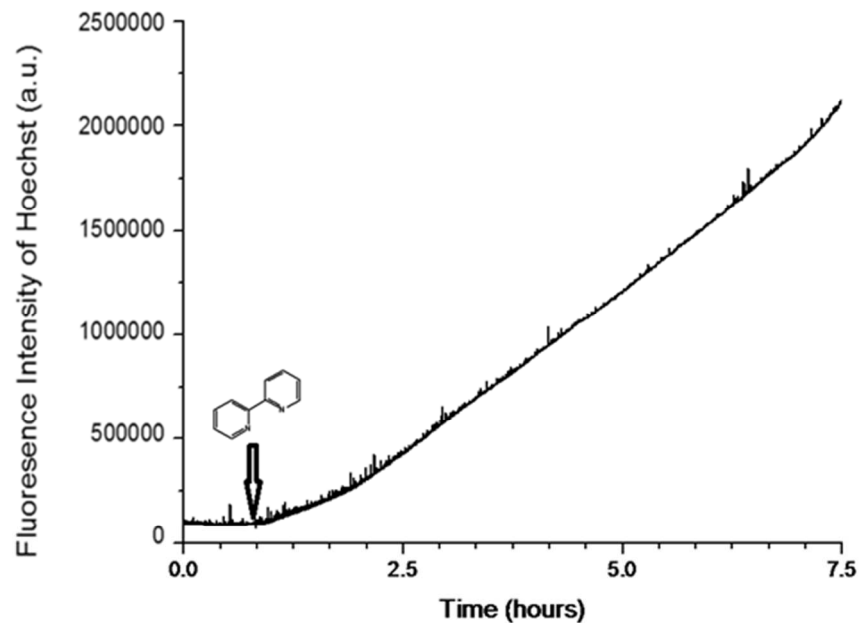

**Figure S5.** Time resolved fluorescent spectrum release profile of Hoechst 33342 cargo from a nickel latched nanogate machine. Solid 2,2'-bipyridine was added as a competitively binding ligand to remove nickel from the iminodiacetic acid nanogates and initiate cargo release. The slow rate of release was due to the low solubility of 2,2'-bipyridine in water.

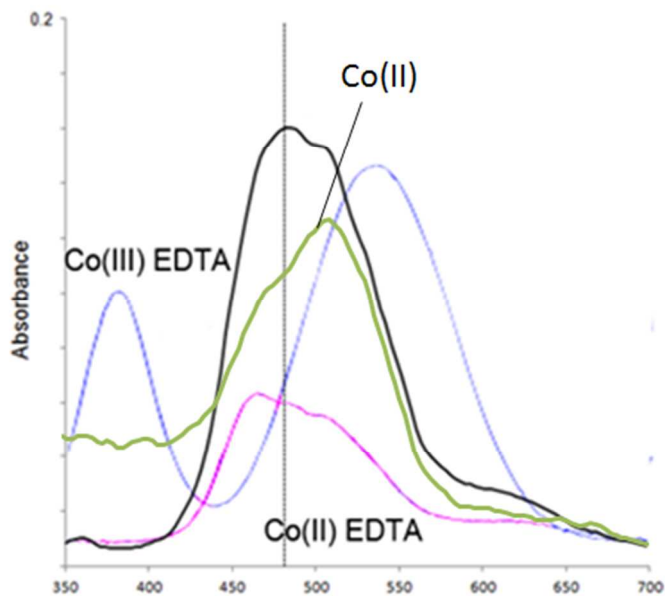

**Figure S6.** UV-Vis spectra of solution Co/EDTA complexes after simulated loading conditions. The oxidation state of cobalt was determined through spectroscopic methods after mimicking the loading and capping conditions of the nanoparticles. In green: UV-Vis spectra of a Co(II) solution in water. In pink: UV-Vis spectra of 5 mM Co(II)EDTA. In blue: Co(III)EDTA complex (Xue, Y.; Traina, S. *J. Environ. Sci. Technol.* **1996**, 30, 1975-1981). In black: UV-VIS spectra of 10 mM cobalt/EDTA complex after undergoing similar conditions as used in the loading/capping procedures. After this process, the cobalt is bound to EDTA as shown in the increase in absorbance at 470 nm, and most of the cobalt/EDTA is still in the +2 oxidation state as indicated by the absence of a peak at 370 nm.

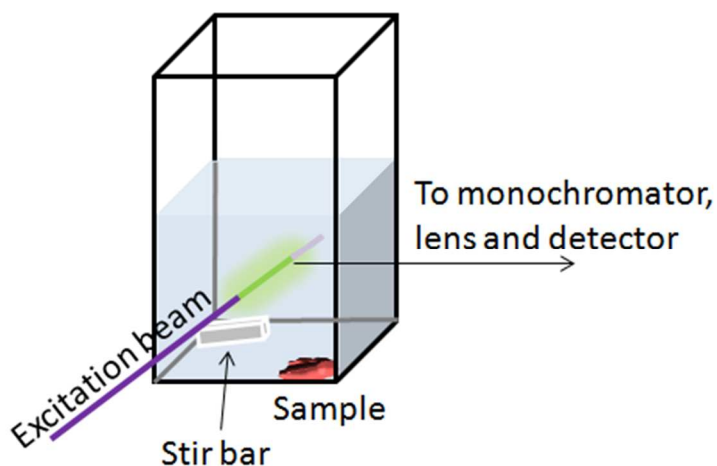

**Figure S7.** Experimental setup for time-resolved fluorescence spectroscopy. An excitation beam is aimed at the solution supernatant, exciting any dye molecules present. A CCD detector cooled to liquid nitrogen temperatures integrates intensities at a specified wavelength in real-time to generate a typical release profile curve.
